# Supplementary material
Source: PubMed Central journal article supplement (PMC3408201)

Supplemental Figure 1

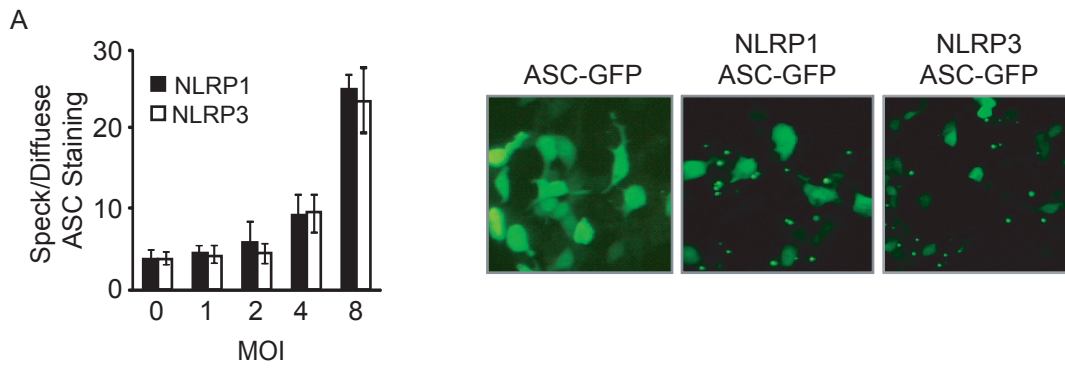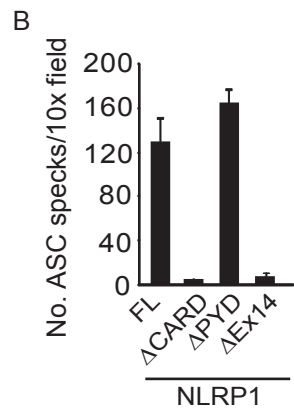

Supplemental Figure 2

A

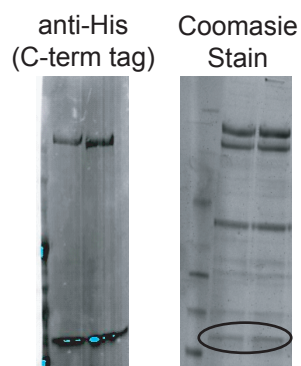

B

MAGGAWGRLA CYLEFLKKEE LKEFQLLLAN KAHSRSSSGE TPAQPEKTS GMEVASYLVAQ YGE  
 QRAWDLA LHTWEQMGLR SLCAQAQEGA GHSPSPFPYSPSEPHLGSPSQ PTSTAVLMPWIHELPA  
 GCTQ GSERRVLRQL PDTSGRRWRE SASLLYQAL PSSPDHESPS QESPNAPTST AVLGSWGSP  
 QPSLAPREQEAPGTQWPLDE TSGIYYTEIR EREREKSEKG RPPWAAVVGT PPQAHTSLQPHHHP  
 WEPSVR ESLCSTWPWK NEDFNQKFTQ LLLLQRPHR SQDPLVKRS WPDYVEENRGH LIEIRDLF  
 GP GLDTQEPRIV ILQGAAGIGK STLARQVKEAWGRGQLYGDR FQHVFYFSCR ELAQSKVVSL A  
 ELIGKDGTA TPAPIRQILSRPERLLFILD GVDEPGWVLQ EPSELCLHWSQPQPADALL GSLLGK  
 TILPEASFLITART TALQNLIPSL EQARWVEVLG FSESSRKEYF YRYFTDERQA RAFRLVKSN KE  
 LWALCLVP WWSWLACTCL MQQMKRKEKL TLTSKTTTTLCLHYLAQALQ AQPLGPQLRD LCSLAA  
 EGIWQKKTLPSPDD LRKHGLDGAIISTFLKMGIL QEHPIPLSYS FHLCFQEFF AAMSYLEDE K  
 GRGKHSNCIIDLEKTL EAY GIHGLFGAST TRFLLGLLSD EGEREMENIF HCRLSQGRNLMQWVPS  
 LQLL LQPHSLES LH CLYETRNTKF LTQVM AHFEE MGMCVETDMELLVCTFCIKF SRHVKKLQLI  
 EGRQHRSTWS PTMVVLFWRV PVTDAYWQILF SVLKVTRNL KELDLSGNSL SHSAVKSLCK TLRR  
 PRCLLE TLRLAGCGLTAEDCKDLAFG L RANQTLTEL DL SFNVLTD A GAKHLCQRLR QPSCKLQR  
 LQLVSCGLTSDC CQDLASVLSA SP SLKELDLQ QNNLDDVGVR LLCEGLRHPACKLIRLGLDQ TT  
 LSDEMRQE LRALEQEK PQ LLIFSRRKPS VMTPT EGLDTGEMSNSTSSL KRQRLG SERA ASHVA  
 QANLK LLDVSKIFPI AEIAEESSPEVVPVELLCVP SPASQGD LHT KPLGTD DDFWGPTGPVATEV  
 VDKEKNLYRVHFPVAGSYRWPNTGLCFV MR EAVTVEIEFC VWDQFLGEIN PQHSWMVAGPLLDI  
 KAEPGA VEAVHLP HFV ALQGGHVDTS L FQMAHFKEE GMLLEKPARVELHHIVLENP SF **SPLGVL**  
**LK MIHNALRFIP VTSVLLYHR VHPEEVTFHLYLIPSDCSIR KAID DLEMKF QFVRIHKPPP LTP L**  
**YMGCRY TVSGSGSGM LEILPKELELC YRSPGEDQLF SEFYVGH LGS GIRLQVKDKK DETLVWEA**  
**LVKPGDLM PATT LIPPARIAVP SPLDAPQLLH FVDQYREQLI ARVTSVEVVDK LHGQVLSQ EQY**  
**ERVLAEN TRPSQMRKLF SLSQSWDRKC KDGLYQALKETHPHLIMELWEKGSKKGLLP LSSKGG R**  
**ADP AFLYKVVGD YKDDDDKHHHHHDV**

# Supplemental Figure 3

## ZU5

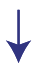

## UPA

Human PHFVALQGGHVDTSLQVAHFKEEGMLLEKPARVELHHIVLENPSFSPLGVLLKMIHNAALRFIPVTSVVLVYHRVHPPEEVTFHLYLIPSDCSIRKAIIDDEEMKFQFVRIHKPPPLTPLYM

Chimp PHFVALQGGHVDTSLQVAHFKEEGMLLEKPARVELHHIVLENPSFSPLGVLLKMIHNAALRFIPVTSVVLVYHRLHPPEEVTFHLYLIPSDCSIRKAIIDDEEMKFQFVRIHKPPPLTPLYM

Orangutan PHFVALQGGHVDTSLQVAHFKEEGMLLEKPARVELHHIVLENPSFSPLGVLLKMIHNAALRFIPVTSVVLVYHRLHPPEEVTFHLYLIPSDCSIRKAIIDDEEMKFQFVRIHKPPPLTPLYM

Rhesus PHFVALQGGHVDTSLQVAHFKEEGMLLEKPARVELHHIILENPSFSPLGVLLKVIHSTLRFPPVNSLVLYHRLHPPEEVTFHLYLIPSDCSIRKAIIDDEETKFQFVRIHKPPPLTPLYM

Marmoset PHFVSLQGGHIDTSLQVAHFKEEGMLLEKPAKVELHHIVLEDPSPMGVLLRMIHNAALRFIPVTSVVLVYHRIHPPEEVTFHLYLIPSDCSIRKAIIDDEETKFQFVRLHKPPPLTPLYM

Panda PHFVDLQGGHVDTSLQVAHLKEEGMLVENPTRVELYHVVLEDPSPMGVLLRMIHNAALRFIPVTSVVLVYHRLQLDEIAFHLYLVPDCCIQAIDDEKKEKQFVQIHKPPPLAQLYV

Dog PHFVDLQGGHVDTSLQVAHLKEEGMLVENPTRVELYHVVLEDPSPMGVLLRMIHNAALRFIPVTSVVLVYHRLQLDEIAFHLYLVPDCCIQAIDDEKKEKQFVQIHKPPPLAQLYV

Cow PHFVAFRGNVDISLQVAHFKEEGMLLEKPARVTPCYAVLENPSFSPLGVLLRMIHNAALRFIPVTSVVLVYHRLQLDEIAFHLYLVPDCCIQAIDDEKKEKQFVQIHKPPPLAQLYV

Horse PHFVVLQGAHVDISLQVAHFKEEGMLLEKPARVEPCYAVLENPSFSPLGVLLRMIHNAALRFIPVTSVVLVYHRLQLDEIAFHLYLVPDCCIQAIDDEKKEKQFVQIHKPPPLAQLYV

Rat PHFVSLQEGKVDSSSLFVHAFHQDHGMVLETPARVEPHFAVLENPSFSPLGVLLRMIHNAALRFIPVTSVVLVYHRLQLDEIAFHLYLVPDCCIQAIDDEKKEKQFVQIHKPPPLAQLYV

Mouse PHFVSLKDKASTDFDKVAHFHQDHGMVLETPDRVKPGYTVLKNPSFSPLGVLLRMIHNAALRFIPVTSVVLVYHRLQLDEIAFHLYLVPDCCIQAIDDEKKEKQFVQIHKPPPLAQLYV

Opossum PHFVHLQGGHVDISLQVAHFKEEGMLVENPTRMESHAIILENPSFSPLGVLLRMIHNAALRFIPVTSVVLVYHRLQLDEIAFHLYLVPDCCIQAIDDEKKEKQFVQIHKPPPLAQLYV

\*\*\* :: . \* \*\*:::\*\*:\* \* : . :\*:\*\*\*\*\*:\*\*:\* : . :\*: . . :\* . . :\*:\*\*\*\*\*:\* \* :\*\*\*\*\*: \* \* :\*\*\*\*\*:\* \* :\*

## UPA

Human GCRYTVSGSGSGMLEILPKELELCYRSPGEDQLFSEFYVGHLSGIRLQVKDKKDETLVW

Chimp GCRYTVSGSGSGMLEILPKELELCYRSPGEDQLFSEFYVGHLSGIRLQVKDKKDETLVW

Orangutan GCRYTVSGSGSGMLEILPKELELCYRSPGEDQLFSEFYVGHLSGIRLQVKDKKDETLVW

Rhesus GCRYTVSGSGSGMLEILPKELELCYRSPGEAQLFSEFYVGHLSGIRLQMKDKKDETLVW

Marmoset GSRVAVSGSE--LEIIPKELELCYRSPGEPQLFSEFYVGHLSGIRLQMKDKKDETLVW

Panda GSRVIVSGSGT--LEAIPKELELCYRSPGEPQIFSEFYVGHLSGIRLQVRDKKYGTVVW

Dog GSRVTVSGSEK--LEIIPKELELCYRSPREPQLFSEFYVGHLSGIRLQVRDKKDDTVVW

Cow GSRVIVSGSEK--LEIIPKELELCYRSPRESQLFSEFYVHRLRSGIRLQIRSKKDGTVVW

Horse GSRVTVSGSKK--LEIIPKELELCYRSPGESQLFSEFYIDHFGTGIKLQMRDKKDGTVVW

Rat GSRVIVSSSKE--VEIIPKELELCYRSPRESQLFSEIYVGNIGSGINLQLTDKYMNIW

Mouse GSRVIVSGSEN--LEITPKELELCYRSPKEFQLFSEIYVGNMGSEIKLQIKNKKMKLIW

Opossum GSRFLVSGSKH--LEIMPTLELCYQSAGECQFFSEIYTSNVKEIISLDLRDPK-GTVVW

\*.\*: \*\*.\* :\* \* \*\*\*\*\*:\* \* \* :\*\*\*:\* :. \* \* :. . . :\* :

Supplementary Figure 4

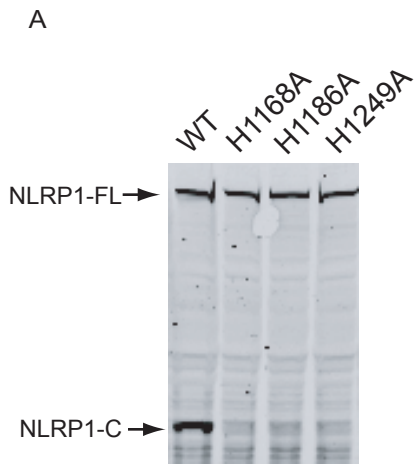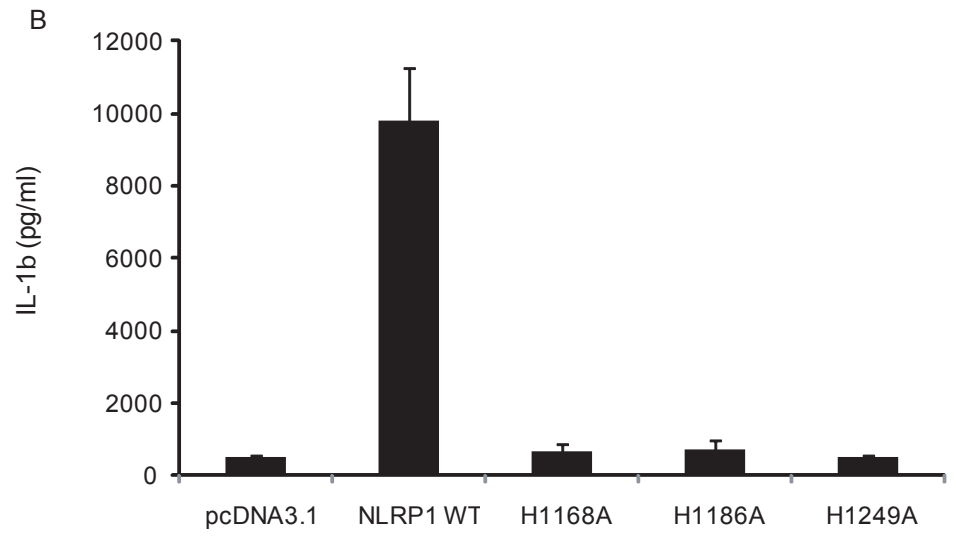

Supplementary Figure 5

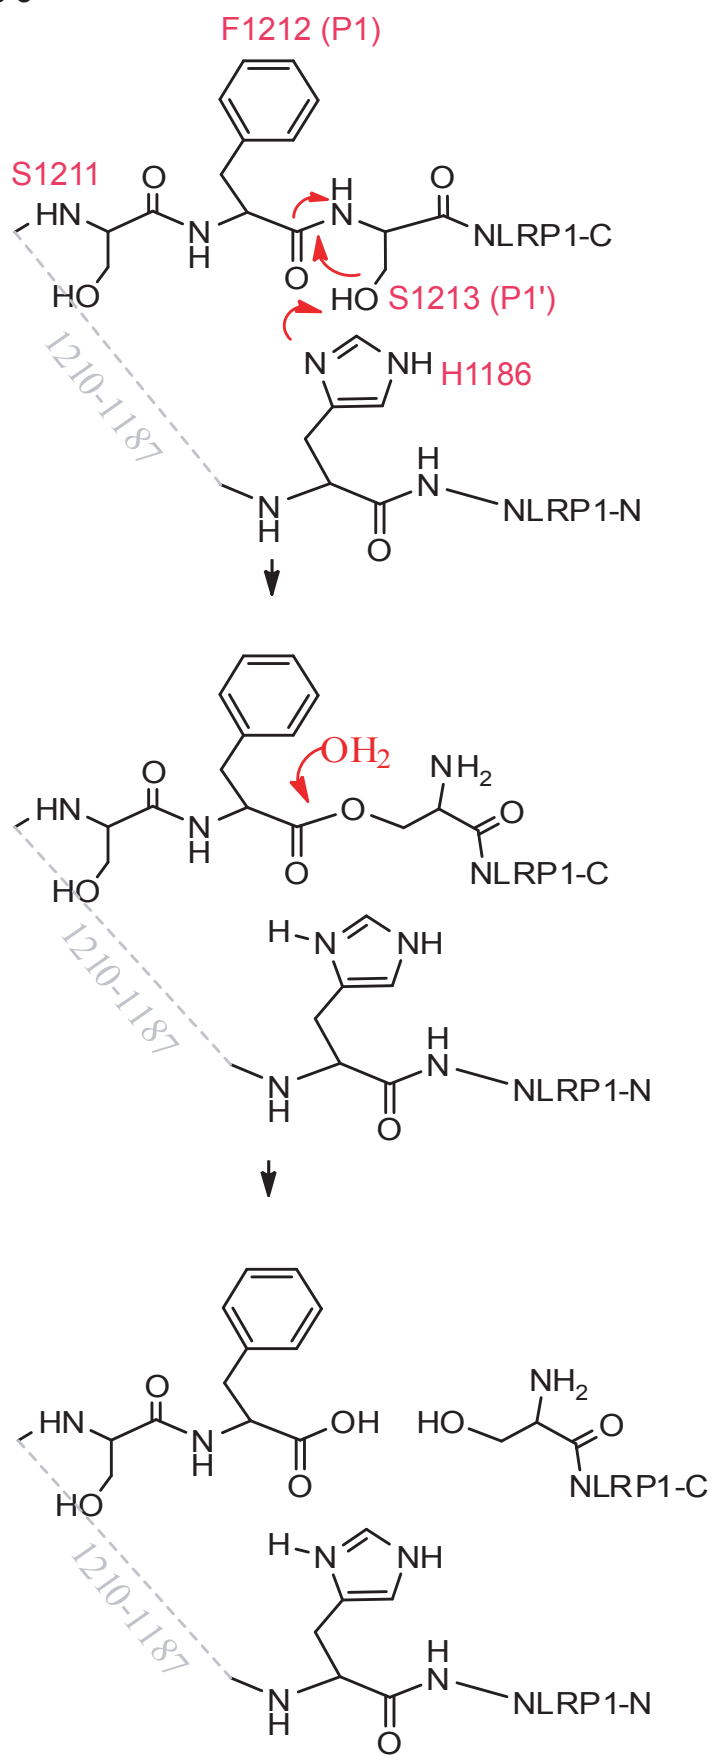

Supplement: supp_M112.378323_jbc.M112.378323-1.pdf [file supp_M112.378323_jbc.M112.378323-1.pdf]
